# Supplementary material
Source: bioRxiv or medRxiv preprint supplement (https://www.biorxiv.org/highwire/filestream/45789/field_highwire_adjunct_files/1/119420-10.pdf)

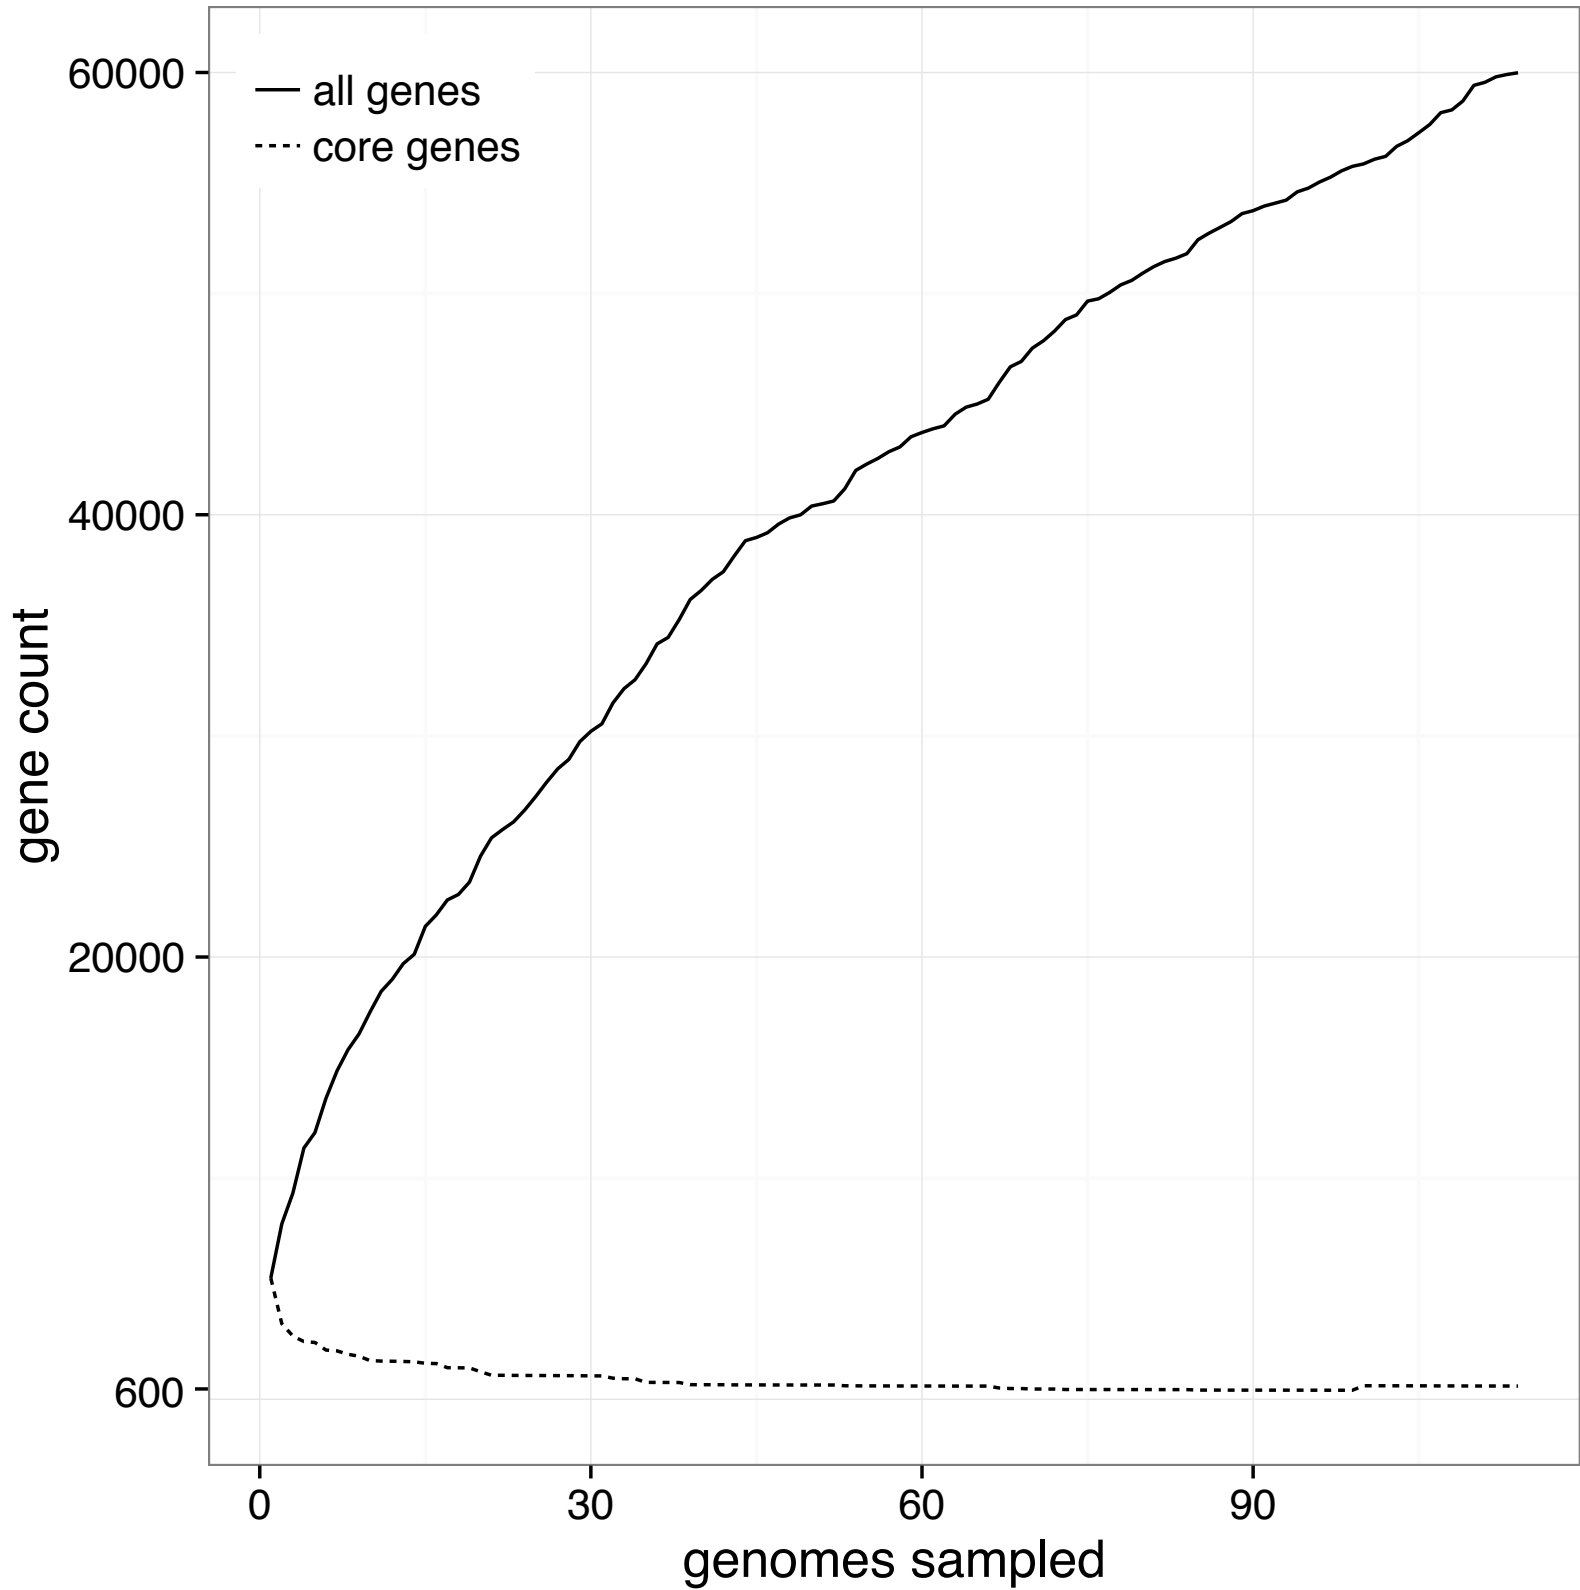

Supplement: Supplementary file [file 119420-10.pdf]
